# Supplementary material for: Multiparametric quantitative magnetic resonance imaging of uterine fibroids for prediction of growth rate—a pilot study
Source: PubMed Central journal article supplement — Quant Imaging Med Surg. 2024 Jun 20;14(7):4362–75. doi: 10.21037/qims-23-1663 (PMC11250352; doi:10.21037/qims-23-1663), 2024-06-20
Supplement: qims-14-07-4362-supplementary.pdf [file qims-14-07-4362-supplementary.pdf]

**Table S1** Change in the total volume of outlined uterine fibroids, stratified by subject characteristics

| Subject characteristic [N]         | Change in TV (cm <sup>3</sup> ) (IQR) | P value* |
|------------------------------------|---------------------------------------|----------|
| Age, years                         |                                       |          |
| ≤38 [9]                            | 7.30 (1.13, 23.04)                    | 0.83     |
| >38 [10]                           | 5.68 (-2.54, 24.61)                   |          |
| Race                               |                                       |          |
| African American [16]              | 4.39 (-0.07, 19.18)                   | 0.55     |
| Other [3]                          | 6.96 (4.26, 23.34)                    |          |
| Income                             |                                       |          |
| <\$64,000 [10]                     | 16.11 (5.24, 39.62)                   | 0.09     |
| ≥\$64,000 [9]                      | 1.52 (-2.79, 6.94)                    |          |
| BMI, kg/m <sup>2</sup>             |                                       |          |
| <30 [11]                           | 5.68 (0.43, 29.21)                    | 0.66     |
| ≥30 [8]                            | 8.03 (-7.10, 18.03)                   |          |
| Insurance                          |                                       |          |
| Private [14]                       | 2.97 (-0.06, 13.43)                   | 0.39     |
| No/medicare/medicaid [4]           | 19.18 (9.55, 36.93)                   |          |
| Past Hormonal Contraception use    |                                       |          |
| Yes [12]                           | 1.55 (-0.01, 16.88)                   | 0.61     |
| No [7]                             | 6.96 (4.39, 34.60)                    |          |
| Current hormonal contraception use |                                       |          |
| Yes [6]                            | 13.04 (4.39, 34.60)                   | 0.28     |
| No [13]                            | 1.55 (-0.24, 16.88)                   |          |
| Family history of fibroids         |                                       |          |
| Yes [11]                           | 13.81 (1.13, 28.06)                   | 0.35     |
| No [8]                             | 2.97 (-0.16, 13.87)                   |          |
| Hypertension                       |                                       |          |
| Yes [5]                            | 19.18 (-3.38, 36.93)                  | 0.74     |
| No [14]                            | 4.39 (0.06, 14.58)                    |          |
| Vitamin D deficiency               |                                       |          |
| Yes [11]                           | 1.52 (-0.32, 15.48)                   | 0.23     |
| No [8]                             | 13.81 (8.48, 29.60)                   |          |
| Red meat intake                    |                                       |          |
| Yes [4]                            | 0.54 (-6.79, 5.91)                    | 0.15     |
| No [15]                            | 10.00 (1.18, 35.88)                   |          |
| Soymilk intake                     |                                       |          |
| Yes [4]                            | 29.18 (9.61, 48.74)                   | 0.87     |
| No [15]                            | 5.68 (0.42, 18.03)                    |          |
| Alcohol intake                     |                                       |          |
| Never or monthly [9]               | 5.68 (1.09, 18.43)                    | 0.92     |
| >2-4 times per month [10]          | 8.07 (-2.44, 24.32)                   |          |

\*, Wilcoxon rank sum test was used. TV, total volume; IQR, interquartile range; BMI, body mass index.
